# Supplementary material
Source: HighWire-hosted journal article supplement (https://bmjopen.bmj.com/content/14/12/e086148)
Supplement: inline-supplementary-material-3 [file inline-supplementary-material-3.pdf]

# Categories of true-or-false scoring criteria

## Supplemental file 3

The top nine most common categories were utilised, with the remaining criteria grouped under 'other'. Below is a presentation of the categories used in the analysis, including further explanations of their definitions, the elements they encompass, and examples of specific scoring criteria.

| Category (no. of criteria in category) | Explanation                                                                                                                                                                                                | Example                                                                                        |
|----------------------------------------|------------------------------------------------------------------------------------------------------------------------------------------------------------------------------------------------------------|------------------------------------------------------------------------------------------------|
| Suggest diagnosis (118)                | Criteria awarding points for suggesting relevant diagnoses.                                                                                                                                                | Does the response mention heart failure as a possible diagnosis?                               |
| Suggest lab test (59)                  | Criteria awarding points for suggesting relevant lab tests, including vital parameters such as oxygen saturation.                                                                                          | Does the response suggest thyroid tests such as TSH?                                           |
| Suggest treatment (47)                 | Criteria awarding points for suggesting treatments, including medications as well as other interventions such as medical shoes or physiotherapy.                                                           | Does the response suggest Long-Acting Muscarinic Antagonists (LAMAs) as treatment?             |
| Patient history inquiry (35)           | Criteria awarding points for suggesting additional questions to further explore the patient's history.                                                                                                     | Does the response suggest the need to ask about the patient's symptoms development over time?" |
| Suggest follow-up (33)                 | Criteria awarding points suggesting appropriate follow-up actions, such as scheduling a future appointment or monitoring the patient's weight.                                                             | Does the response mention the need for a follow-up visit soon (within 2-3 months)?             |
| Life-style advice/questions (22)       | Criteria awarding points for addressing lifestyle-related issues, such as recommending smoking cessation or inquiring about the patient's alcohol consumption. This also includes stress-related concerns. | Does the response mention the importance of encouraging smoking cessation?                     |
| Suggest referral/consultation (21)     | Criteria awarding points for suggesting a relevant referral to a specialist or for recommending consultation with a specialist or experienced colleague.                                                   | Does the response mention the need to consult a psychiatrist and possibly a neurologist?       |
| Suggest physical examination (20)      | Criteria awarding points for suggesting relevant physical examinations.                                                                                                                                    | Does the response mention the need for a neurological examination?                             |

|                                        |                                                                                                                                                                                 |                                                                                                                                                                                                                                                                                              |
|----------------------------------------|---------------------------------------------------------------------------------------------------------------------------------------------------------------------------------|----------------------------------------------------------------------------------------------------------------------------------------------------------------------------------------------------------------------------------------------------------------------------------------------|
| Legal matters and social benefits (18) | Criteria awarding points for addressing legal matters, such as recommending the withdrawal of the patient's driving licence, or discussing social benefits, such as sick leave. | <p>Does the response mention partial sick leave or a change in work tasks as a suggestion?</p> <p>Does the response mention that a report to the Swedish Transport Agency is required if the doctor assesses that a person does not meet the medical requirements for a driving licence?</p> |
| Other (122)                            | Criteria in any other category, including consultation methodology, leadership, prioritisation, patient education, palliative care, radiology suggestions, and more.            | <p>Does the response mention the need to provide the patient with more information about dyspepsia?</p> <p>Does the response mention the need to present the palliative situation (end-of-life conversation) to the relatives and the patient?</p>                                           |
